# Supplementary material for: Efficacy of Exercise on Muscle Function and Physical Performance in Older Adults with Sarcopenia: An Updated Systematic Review and Meta-Analysis
Source: MDPI journal article supplement (doi:10.3390/ijerph19138212), 2022-07-05
Supplement: s1 [file s1]

## Supplementary S2

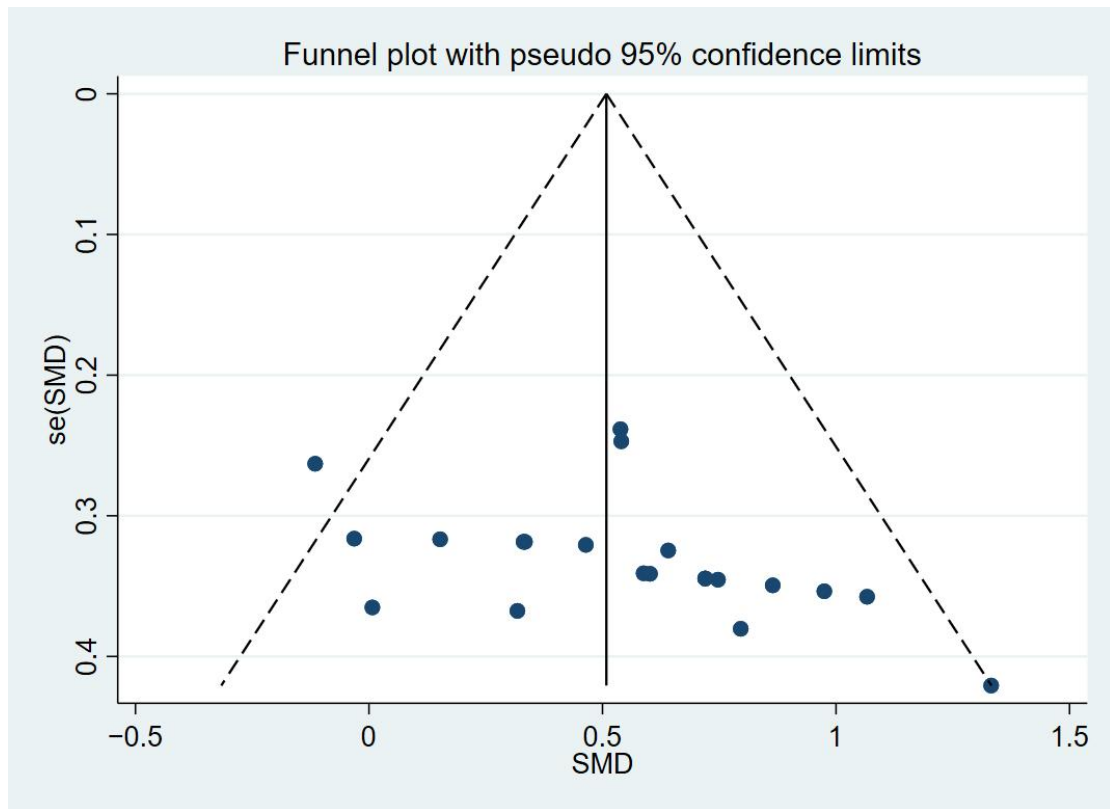

Figure S1. Funnel plot of knee extension strength

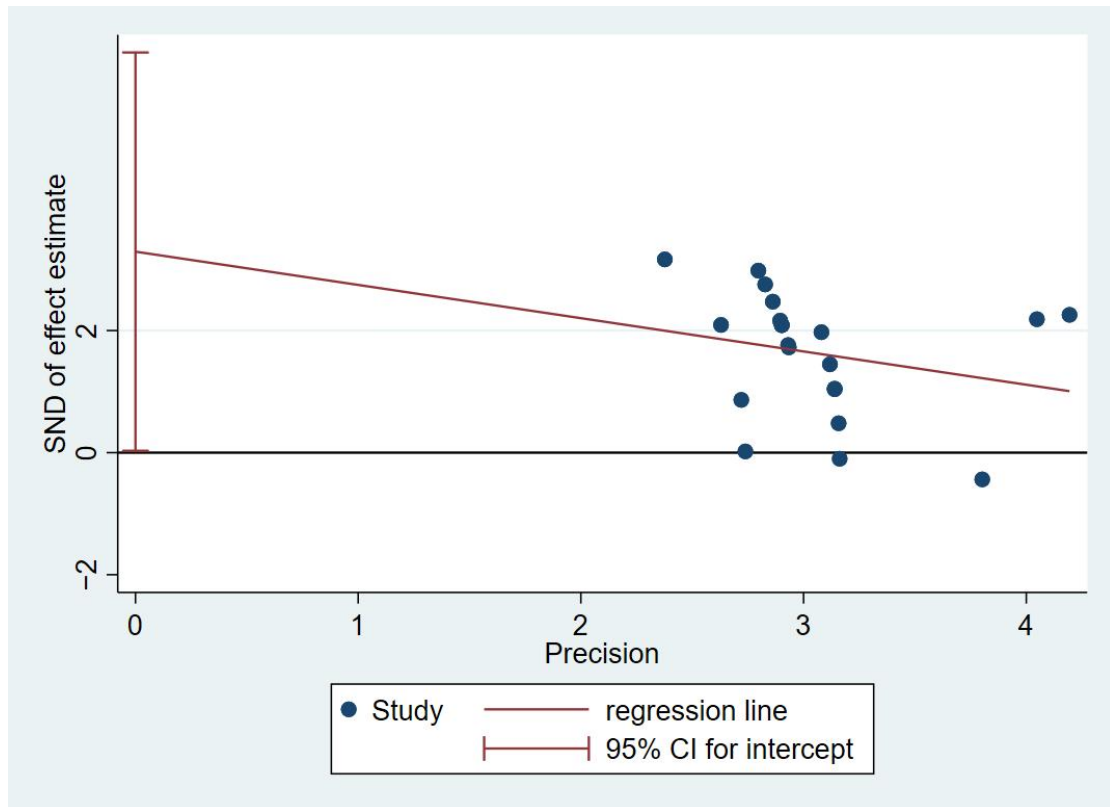

Figure S2. Egger plot of knee extension strength
