# Supplementary material for: Efficacy of Exercise on Muscle Function and Physical Performance in Older Adults with Sarcopenia: An Updated Systematic Review and Meta-Analysis
Source: MDPI journal article supplement (doi:10.3390/ijerph19138212), 2022-07-05
Supplement: s1 [file s1]

## Supplementary S1

### Search strategy

#### PubMed (abstract/title/keywords)

((("sarcopenia"[Title/Abstract] OR "sarcopen\*"[Title/Abstract]) AND ("exercise"[Title/Abstract] OR "exercis\*"[Title/Abstract] OR ("exercis\*"[Title/Abstract] AND ("endurance"[Title/Abstract] OR "aerobic"[Title/Abstract] OR "resistance"[Title/Abstract] OR "balance"[Title/Abstract] OR "flexibility"[Title/Abstract] OR "combi\*"[Title/Abstract] OR "mixed"[Title/Abstract] OR "multi\*"[Title/Abstract] OR "eccentric"[Title/Abstract] OR "eccentric"[Title/Abstract] OR "concentric"[Title/Abstract] OR "isometric"[Title/Abstract] OR ("plyometric"[All Fields] OR "plyometrics"[All Fields])))) OR "walk\*"[Title/Abstract] OR "run"[Title/Abstract]) AND ("muscle mass"[Title/Abstract] OR "muscle strength"[Title/Abstract] ((("sarcopenia"[Title/Abstract] OR "sarcopen\*"[Title/Abstract]) AND ("exercise"[Title/Abstract] OR "exercis\*"[Title/Abstract] OR ("exercis\*"[Title/Abstract] AND ("endurance"[Title/Abstract] OR "aerobic"[Title/Abstract] OR "resistance"[Title/Abstract] OR "balance"[Title/Abstract] OR "flexibility"[Title/Abstract] OR "combi\*"[Title/Abstract] OR "mixed"[Title/Abstract] OR "multi\*"[Title/Abstract] OR "eccentric"[Title/Abstract] OR "eccentric"[Title/Abstract] OR "concentric"[Title/Abstract] OR "isometric"[Title/Abstract] OR ("plyometric"[All Fields] OR "plyometrics"[All Fields])))) OR "walk\*"[Title/Abstract] OR "run"[Title/Abstract]) AND ("muscle mass"[Title/Abstract] OR "muscle strength"[Title/Abstract] OR "muscle function"[Title/Abstract] OR "fat-free mass"[Title/Abstract] OR "lean mass"[Title/Abstract] OR ("musc\*"[Title/Abstract] AND ("function\*"[Title/Abstract] OR "power"[Title/Abstract] OR "size"[Title/Abstract] OR "volume"[Title/Abstract] OR "thick\*"[Title/Abstract] OR "enlarge\*"[Title/Abstract] OR ("frailty"[MeSH Terms] OR "frailty"[All Fields] OR "weakness"[All Fields] OR "weaknesses"[All Fields])))) OR ("physical"[Title/Abstract] AND ("fitness"[Title/Abstract] OR "function\*"[Title/Abstract] OR "capacity"[Title/Abstract] OR "disability"[Title/Abstract] OR ("perform"[All Fields] OR "performable"[All Fields] OR "performance"[All Fields] OR "performance s"[All Fields] OR "performances"[All Fields] OR "performative"[All Fields] OR "performatively"[All Fields] OR "performatives"[All Fields] OR "performativities"[All Fields]

OR "performativity"[All Fields] OR "performed"[All Fields] OR "performer"[All Fields] OR "performer s"[All Fields] OR "performers"[All Fields] OR "performing"[All Fields] OR "performs"[All Fields])))) AND ("aged"[Title/Abstract] OR "aging"[Title/Abstract] OR "geriatric\*"[Title/Abstract] OR "old"[Title/Abstract] OR "ageing"[Title/Abstract] OR "senior"[Title/Abstract] OR "elder\*"[Title/Abstract] OR "adult\*"[Title/Abstract])) AND ((fha[Filter]) AND (clinicaltrial[Filter]) AND (humans[Filter]) AND (english[Filter])) OR "muscle function"[Title/Abstract] OR "fat-free mass"[Title/Abstract] OR "lean mass"[Title/Abstract] OR ("musc\*"[Title/Abstract] AND ("function\*"[Title/Abstract] OR "power"[Title/Abstract] OR "size"[Title/Abstract] OR "volume"[Title/Abstract] OR "thick\*"[Title/Abstract] OR "enlarge\*"[Title/Abstract] OR ("frailty"[MeSH Terms] OR "frailty"[All Fields] OR "weakness"[All Fields] OR "weaknesses"[All Fields])))) OR ("physical"[Title/Abstract] AND ("fitness"[Title/Abstract] OR "function\*"[Title/Abstract] OR "capacity"[Title/Abstract] OR "disability"[Title/Abstract] OR ("perform"[All Fields] OR "performable"[All Fields] OR "performance"[All Fields] OR "performance s"[All Fields] OR "performances"[All Fields] OR "performative"[All Fields] OR "performatively"[All Fields] OR "performatives"[All Fields] OR "performativities"[All Fields] OR "performativity"[All Fields] OR "performed"[All Fields] OR "performer"[All Fields] OR "performer s"[All Fields] OR "performers"[All Fields] OR "performing"[All Fields] OR "performs"[All Fields])))) AND ("aged"[Title/Abstract] OR "aging"[Title/Abstract] OR "geriatric\*"[Title/Abstract] OR "old"[Title/Abstract] OR "ageing"[Title/Abstract] OR "senior"[Title/Abstract] OR "elder\*"[Title/Abstract] OR "adult\*"[Title/Abstract])) AND ((fha[Filter]) AND (clinicaltrial[Filter]) AND (humans[Filter]) AND (english[Filter]))

(N = 145)

### **Web of Science (Topic)**

S1: sarcopenia OR sarcopen\*

S2: exercise OR exercis\* OR (exercis\* AND (endurance OR aerobic OR resistance OR balance OR flexibility OR combi\* OR mixed OR multi\* OR eccentric OR concentric OR isometric OR plyometric)) OR walk\* OR run\*

S3: “muscle mass” OR “muscle strength” OR “muscle function” OR “fat-free mass” OR “lean mass” OR (musc\* AND (function\* OR power OR size OR volume OR thick\* OR enlarge\* OR weakness)) OR (physical AND (fitness OR function\* OR capacity OR disability OR performance))

S4: aged OR aging OR geriatric\* OR old\* OR ageing OR senior OR elder\* OR adult\*

S5: S1+S2+S3+S4 (N = 1976)

S6: Filters– English; article;

NOT Title=(relation\* OR correlation OR study protocol OR healthy OR cross\* OR associat\* OR longitudinal OR mouse OR rat OR mice OR update)

S7: S5 + S6 (N = 1020)

#### **EBSCOhost (Text All) (includes Medline, PsycINFO and sportdiscu)**

S1: sarcopenia OR sarcopen\*

S2: exercise OR exercis\* OR (exercis\* AND (endurance OR aerobic OR resistance OR balance OR flexibility OR combi\* OR mixed OR multi\* OR eccentric OR concentric OR isometric OR plyometric)) OR walk\* OR run\*

S3: “muscle mass” OR “muscle strength” OR “muscle function” OR “fat-free mass” OR “lean mass” OR (musc\* AND (function\* OR power OR size OR volume OR thick\* OR enlarge\* OR weakness)) OR (physical AND (fitness OR function\* OR capacity OR disability OR performance))

S4: aged OR aging OR geriatric\* OR old\* OR ageing OR senior OR elder\* OR adult\*

S5: S1+S2+S3+S4

S6: Filters– English; academic journals; aged 65+ years

S7: NOT Title=(relation\* OR correlation OR study protocol OR healthy OR cross\* OR associat\* OR longitudinal OR mouse OR rat OR mice OR update)

S8: S6 + S7 (N = 1175)

#### **ProQuest**

noft(sarcopenia OR sarcopen\*) AND noft(exercise OR exercis\* OR (exercis\* AND (endurance OR aerobic OR resistance OR balance OR flexibility OR combi\* OR mixed OR multi\* OR eccentric OR concentric OR isometric OR plyometric)) OR walk\* OR run\*) AND noft("muscle mass" OR "muscle strength" OR "muscle function" OR "fat-free mass" OR "lean mass" OR (musc\* AND (function\* OR power OR size OR volume OR thick\* OR enlarge\* OR weakness)) OR (physical AND (fitness OR function\* OR capacity OR disability OR performance))) AND noft(aged OR aging OR geriatric\* OR old\* OR ageing OR senior OR elder\* OR adult\*) NOT ti((relation\* OR correlation OR study protocol OR healthy OR cross\* OR associat\* OR longitudinal OR mouse OR rat OR mice OR update))

(N = 869)

### Scopus

( TITLE-ABS-KEY ( sarcopenia OR sarcopen\* ) AND TITLE-ABS-KEY ( exercise OR exercis\* OR ( exercis\* AND ( endurance OR aerobic OR resistance OR balance OR flexibility OR combi\* OR mixed OR multi\* OR eccentric OR concentric OR isometric OR plyometric ) ) OR walk\* OR run\* ) AND TITLE-ABS-KEY ( “muscle AND mass” OR “muscle AND strength” OR “muscle AND function” OR “fatfree AND mass” OR “lean AND mass” OR ( musc\* AND ( function\* OR power OR size OR volume OR thick\* OR enlarge\* OR weakness ) ) OR ( physical AND ( fitness OR function\* OR capacity OR disability OR performance ) ) ) AND TITLE-ABS-KEY ( aged OR aging OR geriatric\* OR old\* OR ageing OR senior OR elder\* OR adult\* ) AND NOT TITLE ( ( relation\* OR correlation OR study AND protocol OR healthy OR cross\* OR associat\* OR longitudinal OR mouse OR rat OR mice OR update ) ) )

(N = 776)

### Cochrane library

S1: sarcopenia OR sarcopen\*

S2: exercise OR exercis\* OR (exercis\* AND (endurance OR aerobic OR resistance OR balance OR flexibility OR combi\* OR mixed OR multi\* OR eccentric OR concentric OR isometric OR plyometric)) OR walk\* OR run\*

S3: “muscle mass” OR “muscle strength” OR “muscle function” OR “fat-free mass” OR “lean mass” OR (musc\* AND (function\* OR power OR size OR volume OR thick\* OR enlarge\* OR weakness)) OR (physical AND (fitness OR function\* OR capacity OR disability OR performance))

S4: aged OR aging OR geriatric\* OR old\* OR ageing OR senior OR elder\* OR adult\*

S5: S1+S2+S3+S4

S6: Filters–trials

S7: S5 + S6 (N = 846)

## EMBASE

(sarcopenia:ab,ti OR sarcopen\*:ab,ti) AND (exercise:ab,ti OR exercis\*:ab,ti OR (exercis\*:ab,ti AND (endurance:ab,ti OR aerobic:ab,ti OR resistance:ab,ti OR balance:ab,ti OR flexibility:ab,ti OR combi\*:ab,ti OR mixed:ab,ti OR multi\*:ab,ti OR eccentric:ab,ti OR concentric:ab,ti OR isometric:ab,ti OR plyometric:ab,ti)) OR walk\*:ab,ti OR run\*:ab,ti) AND ('muscle mass':ab,ti OR 'muscle strength':ab,ti OR 'muscle function':ab,ti OR 'fat-free mass':ab,ti OR 'lean mass':ab,ti OR (musc\*:ab,ti AND (function\*:ab,ti OR power:ab,ti OR size:ab,ti OR volume:ab,ti OR thick\*:ab,ti OR enlarge\*:ab,ti OR weakness:ab,ti)) OR (physical:ab,ti AND (fitness:ab,ti OR function\*:ab,ti OR capacity:ab,ti OR disability:ab,ti OR performance:ab,ti))) AND (aged:ab,ti OR aging:ab,ti OR geriatric\*:ab,ti OR old\*:ab,ti OR ageing:ab,ti OR senior:ab,ti OR elder\*:ab,ti OR adult\*:ab,ti) NOT (relation\*:ti OR correlation:ti OR 'study protocol':ti OR healthy:ti OR cross\*:ti OR associat\*:ti OR longitudinal:ti OR mouse:ti OR rat:ti OR mice:ti OR update:ti)

Filters– English; article;

(N = 533)

维普同义词扩展：骨骼肌减少症+sarcopenia+肌肉减少症+少肌症+肌少症

(((((题名或关键词=骨骼肌减少症 OR 题名或关键词=sarcopenia) OR 题名或关键词=肌肉减少症) OR 题名或关键词=少肌症) OR 题名或关键词=肌少症) AND 题名或关键词=运动) AND (题名或关键词=老人 OR 题名或关键词=老年人)) AND (((文摘=RCT OR 文摘=随机对照) OR 文摘=随机分配) OR 文摘=随机))

(N=10)

知网

(( (主题=肌少症 或者 题名=肌少症 或者 v\_subject=中英文扩展(肌少症) 或者 title=中英文扩展(肌少症)) 或者 (主题=肌肉减少症 或者 题名=肌肉减少症 或者 v\_subject=中英文扩展(肌肉减少症) 或者 title=中英文扩展(肌肉减少症))) 或者 (主题=骨骼肌减少症 或者 题名=骨骼肌减少症 或者 v\_subject=中英文扩展(骨骼肌减少症) 或者 title=中英文扩展(骨骼肌减少症))) 并且 (((主题=运动 或者 题名=运动 或者 v\_subject=中英文扩展(运动) 或者 title=中英文扩展(运动)) 或者 (主题=有氧运动 或者 题名=有氧运动 或者 v\_subject=中英文扩展(有氧运动) 或者 title=中英文扩展(有氧运动))) 或者 (主题=锻炼 或者 题名=锻炼 或者 v\_subject=中英文扩展(锻炼) 或者 title=中英文扩展(锻炼))) 或者 (主题=阻力运动 或者 题名=阻力运动 或者 v\_subject=中英文扩展(阻力运动) 或者 title=中英文扩展(阻力运动))) 并且 ((主题=老年人 或者 题名=老年人 或者 v\_subject=中英文扩展(老年人) 或者 title=中英文扩展(老年人)) 或者 (主题=老人 或者 题名=老人 或者 v\_subject=中英文扩展(老人) 或者 title=中英文扩展(老人))) 并且 (((摘要=随机对照试验 或者 abstract\_en=中英文扩展(随机对照试验)) 或者 (摘要=随机对照 或者 abstract\_en=中英文扩展(随机对照))) 或者 (摘要=中英文扩展(RCT) 或者 abstract\_en=RCT)) (模糊匹配)

(N=5)
